# Supplementary material for: Improved voltage and solubility in hybrid non-aqueous redox flow batteries using a molecular 3,4-ethylenedioxythiophene (EDOT) derivative with a stable radical cation state
Source: Royal Society of Chemistry journal article supplement (doi:10.1039/d4tc04561k), 2024-11-20
Supplement: d4tc04561k1.pdf [file d4tc04561k1.pdf]

Supporting Information for:

## Improved voltage and solubility in non-aqueous redox flow batteries using a molecular 3,4-ethylenedioxythiophene (EDOT) derivative with stable radical cation state

Hee Kyung Hwang,<sup>a</sup> Yejoo Park,<sup>a</sup> Jisang Yeom, Yohan Ahn,<sup>a</sup> Yeasin Khan,<sup>a,b</sup> Jeewoo Lim,<sup>a</sup>

Clément Cabanetos,<sup>c</sup> Jung Hwa Seo,<sup>b</sup> Je Seung Lee,<sup>a</sup> Bright Walker<sup>a</sup>

<sup>a</sup>Department of Chemistry, Kyung Hee University, Seoul, 02447, Republic of Korea

<sup>b</sup>Department of Physics, University of Seoul, Seoul, 02504, Republic of Korea

<sup>c</sup>Univ Angers, CNRS, Moltech-Anjou, SFR Matrix, F-49000 Angers, France.

E-mail: [walker@khu.ac.kr](mailto:walker@khu.ac.kr), [leejs70@khu.ac.kr](mailto:leejs70@khu.ac.kr)

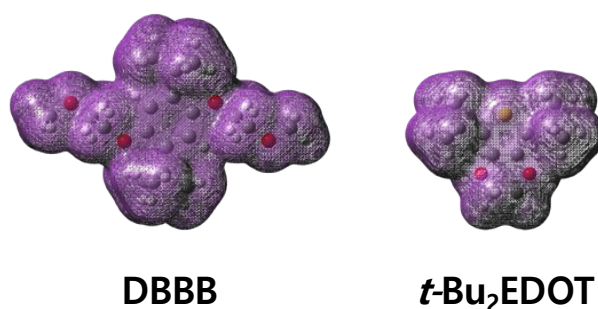

**Figure S1.** Predicted molecular volume of DBBB (3333.7 Bohr<sup>3</sup>) and *t*-Bu<sub>2</sub>EDOT (2209.4 Bohr<sup>3</sup>).

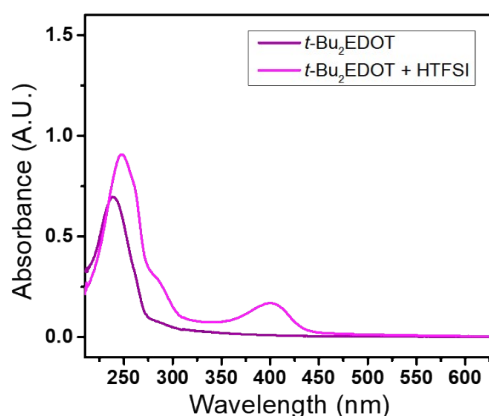

**Figure S2.** UV-Vis spectrum of only *t*-Bu<sub>2</sub>EDOT and *t*-Bu<sub>2</sub>EDOT with HTFSI. The purple line corresponds to 50 μM *t*-Bu<sub>2</sub>EDOT and the pink line corresponds to 100 μM *t*-Bu<sub>2</sub>EDOT with 50 μM of HTFSI. The changes in absorption spectrum are irreversible and indicate decomposition of *t*Bu<sub>2</sub>EDOT in the presence of acid.

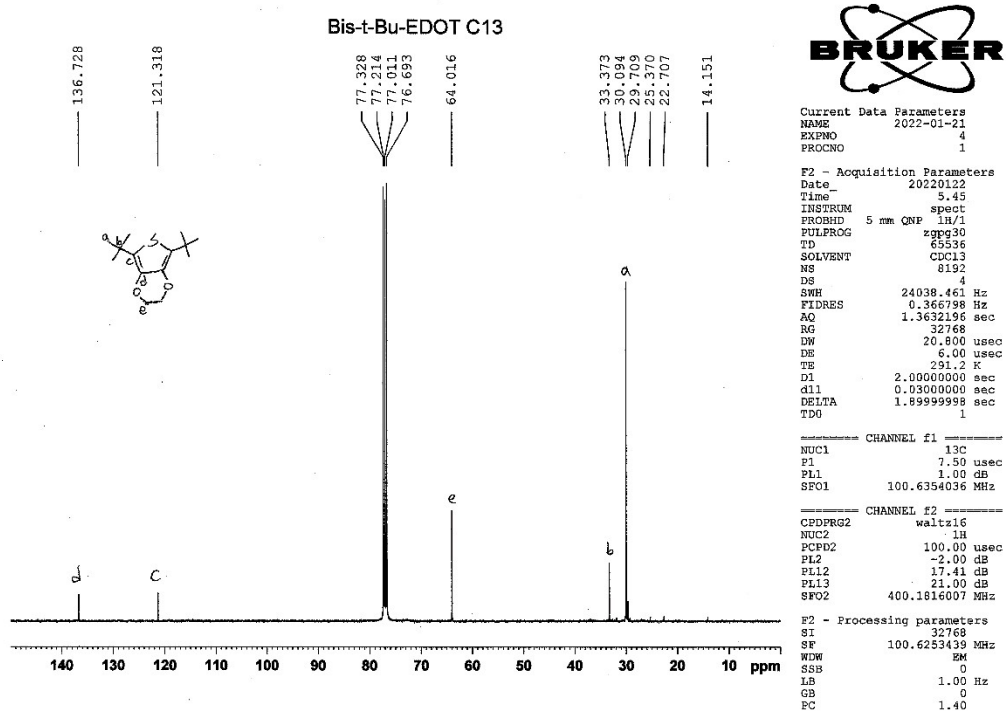

**Figure S3.**  $^{13}\text{C}$ NMR spectrum of *t*Bu<sub>2</sub>EDOT.

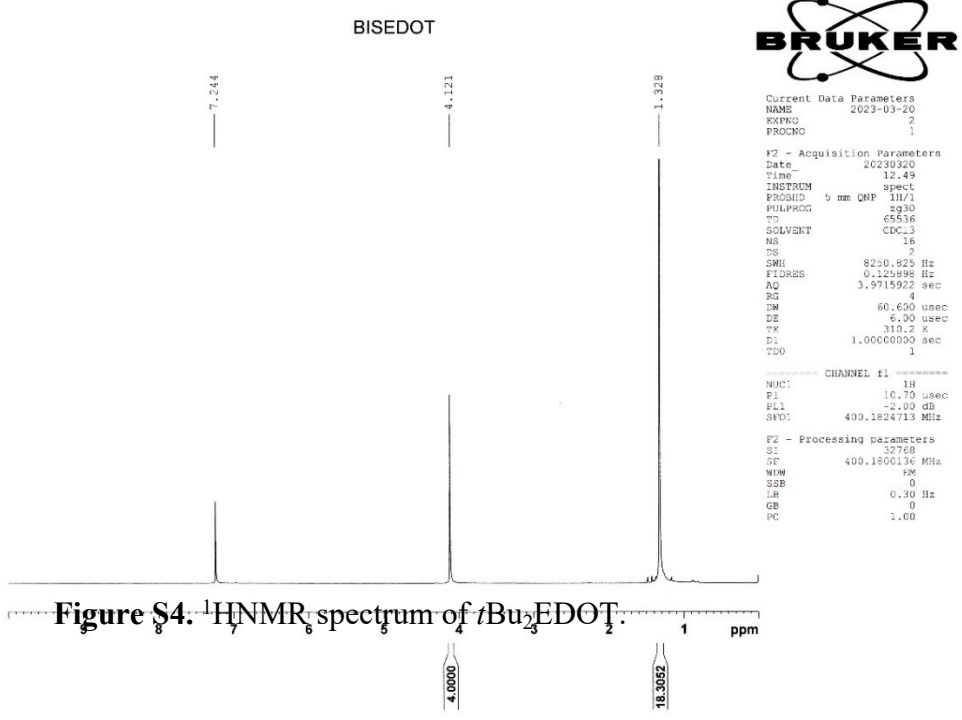

| Best Name | Formula                                              | m/z (prec.) | CAS          | RT (DB) | RT Diff | Score | Score (Lib) | Score (Fwd) | Score (Rev) | Lib/DB   |
|-----------|------------------------------------------------------|-------------|--------------|---------|---------|-------|-------------|-------------|-------------|----------|
| Yes       | 1,2,3,5,7-PENTAMETHYL-1H-PYRROLO[2,3-F]QUINOLIN-9-OL | C16H18N2O   | 2000330-78-7 |         |         | 68.34 | 68.34       |             |             | W10N11.L |

Observed Spectrum

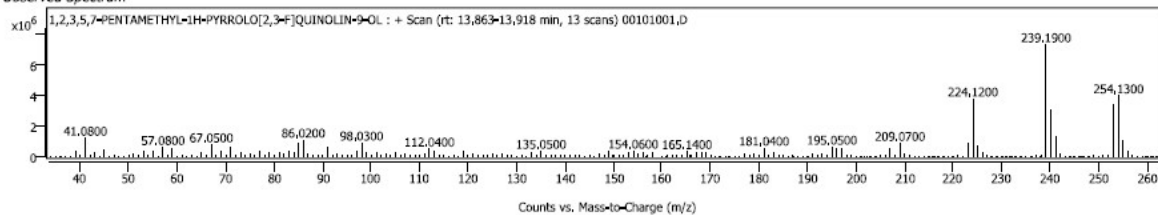

Mirror Plot

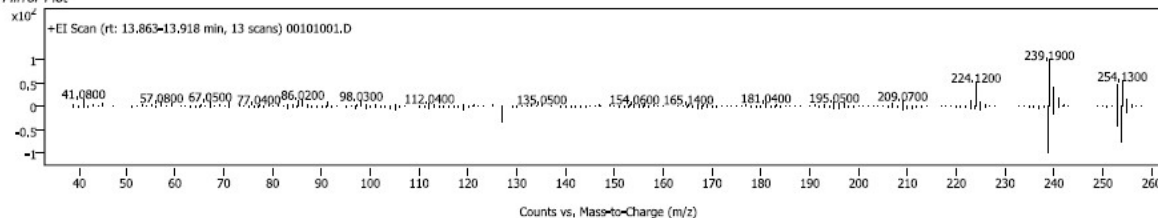

**Figure S5.** Mass spectrum of  $t\text{Bu}_2\text{EDOT}$ . The named compound corresponds to the best fit for the observed spectrum among previously reported compounds, however,  $t\text{-Bu}_2\text{EDOT}$  has not been reported before.

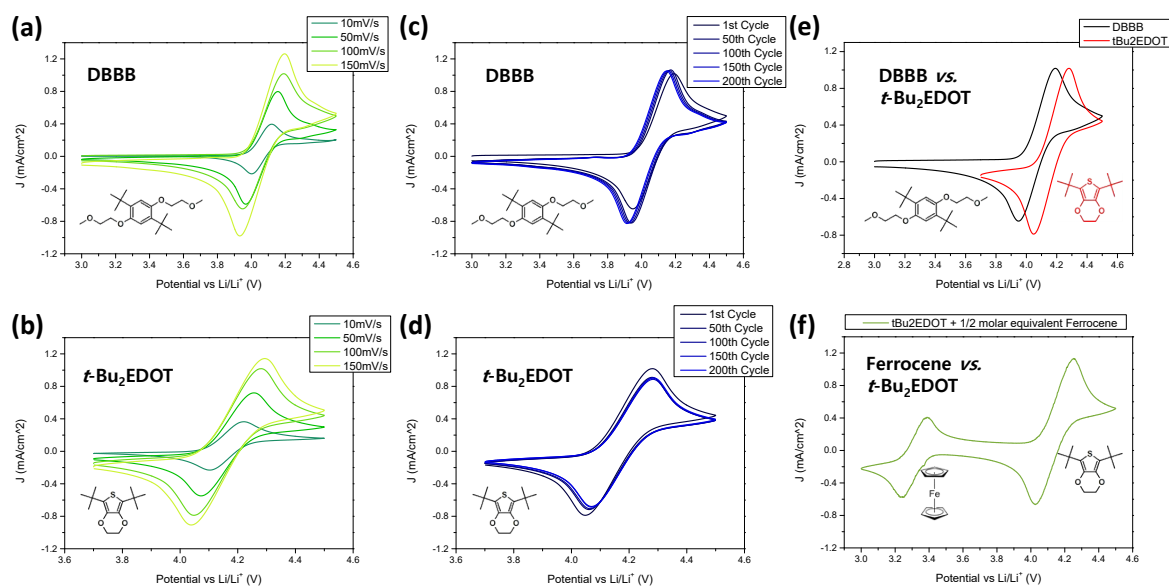

**Figure S6.** Cyclic voltammograms of DBBB (10 mM) and *t*-Bu<sub>2</sub>EDOT (10 mM) using a lithium reference electrode under an Ar atmosphere in 100 mM LiTFSI in propylene carbonate. (a) DBBB and (b) *t*-Bu<sub>2</sub>EDOT at different scan rates; (c) DBBB and (d) *t*-Bu<sub>2</sub>EDOT over 200 scan cycles. (e) DBBB vs. *t*-Bu<sub>2</sub>EDOT at a scan rate of 100 mV/s. (f) Ferrocene vs. *t*-Bu<sub>2</sub>EDOT at a scan rate of 100 mV/s.

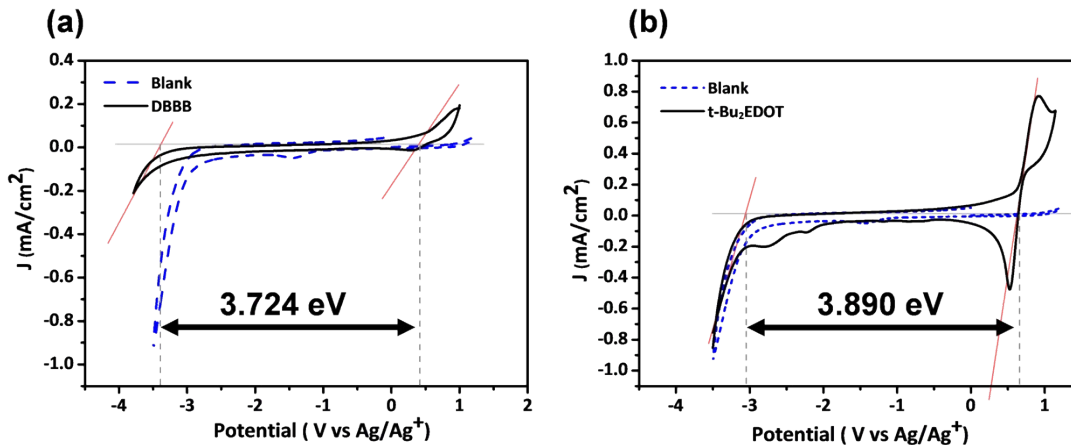

**Figure S7.** Cyclic voltammograms of 10 mM DBBB (a) and 10 mM *t*-Bu<sub>2</sub>EDOT (b) using 100 mM LiTFSI/PC as an electrolyte solution over a wide potential range. Scans of electrolyte only are included for comparison..

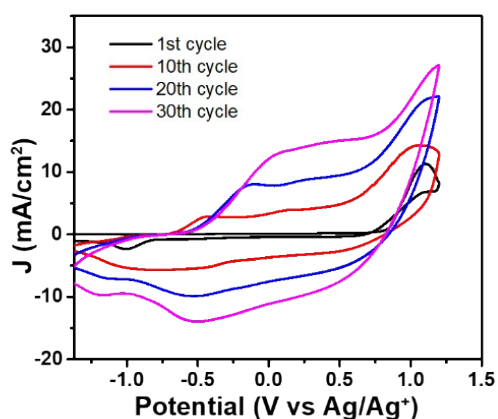

**Figure S8.** Cyclic voltammograms of 13 mM 3,4-ethylenedioxythiophene (EDOT) dissolved in 100 mM LiTFSI/PC solution over variable numbers of cycles.

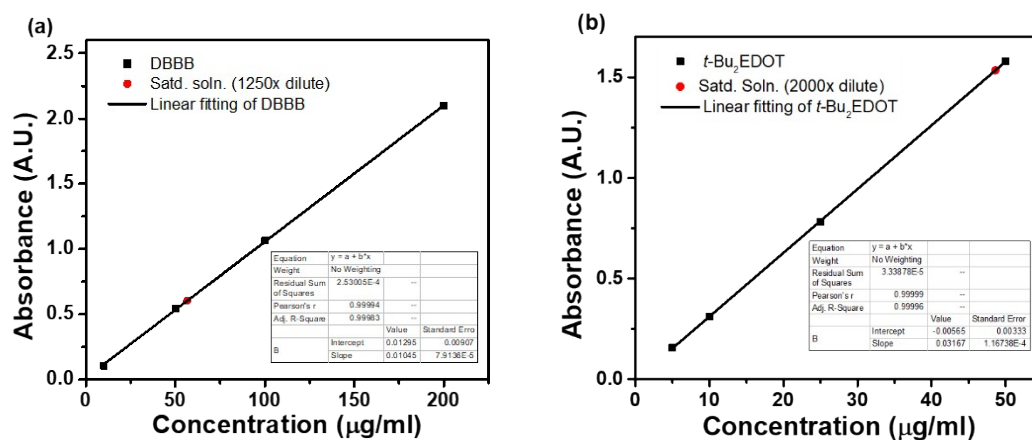

**Figure S9.** Calibration curves and Beer-Lambert fits of concentration vs absorbance for (a) DBBB, (b) *t*-Bu<sub>2</sub>EDOT.

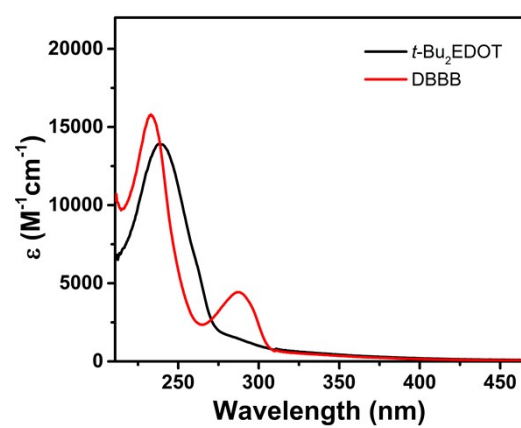

**Fig. S10.** UV-vis absorbance of *t*-Bu<sub>2</sub>EDOT (black line) and DBBB (red line) solutions (50  $\mu$ M) in PC.

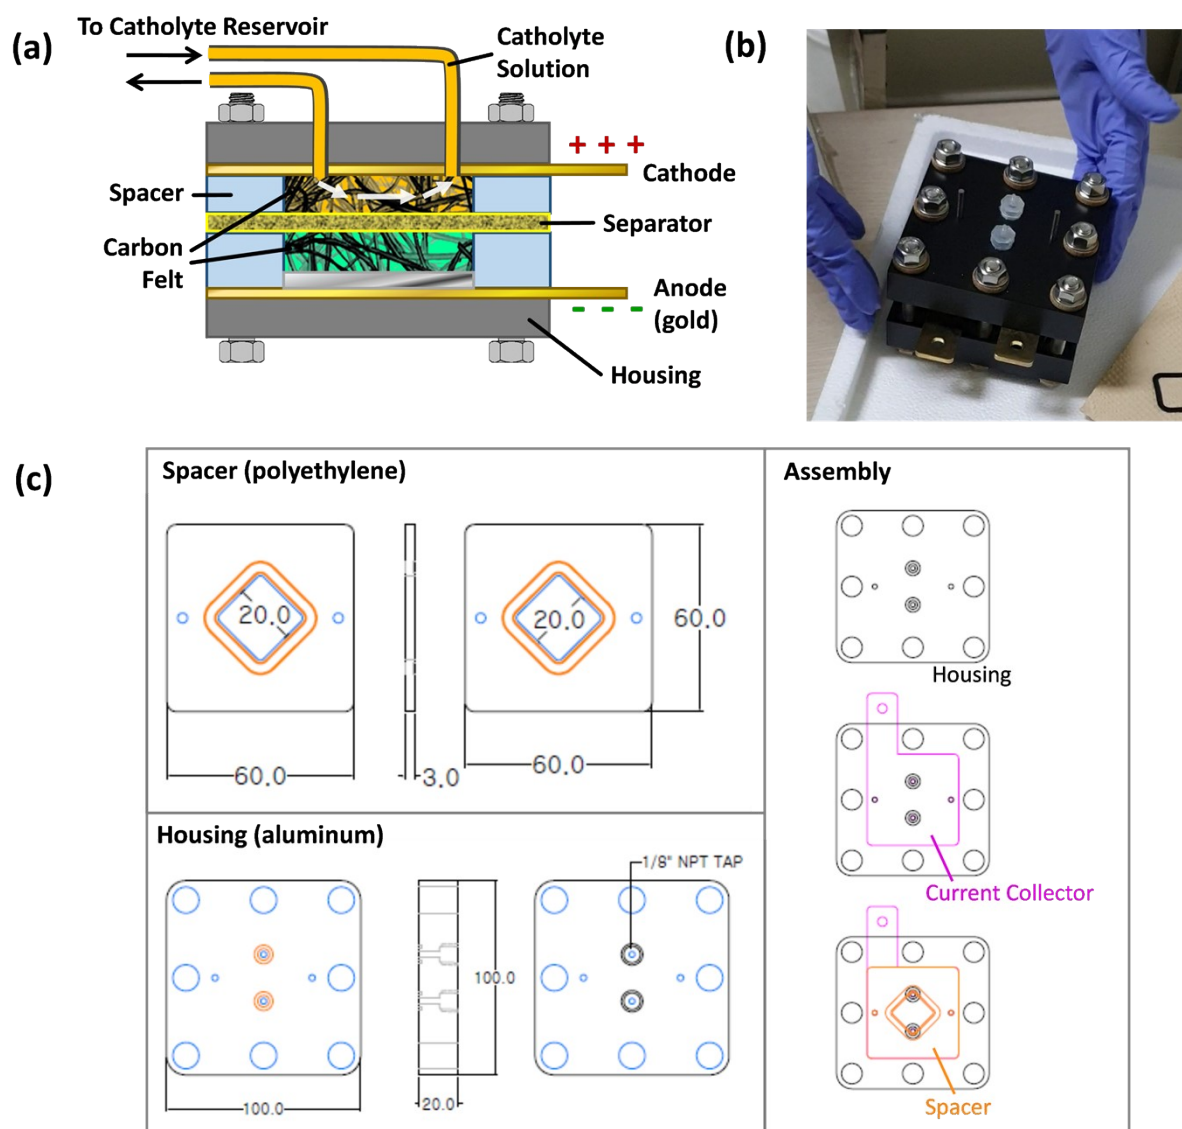

**Figure S11.** Redox flow cell design. (a) Diagram showing components. (b) Photograph showing assembled cell. (c) Diagrams showing dimensions (in mm) of spacer, housing and current collector.



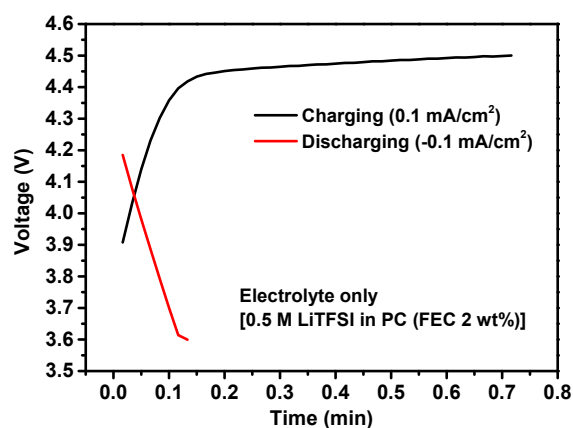

**Figure S12.** Charging and discharging curves for the battery containing electrolyte only.

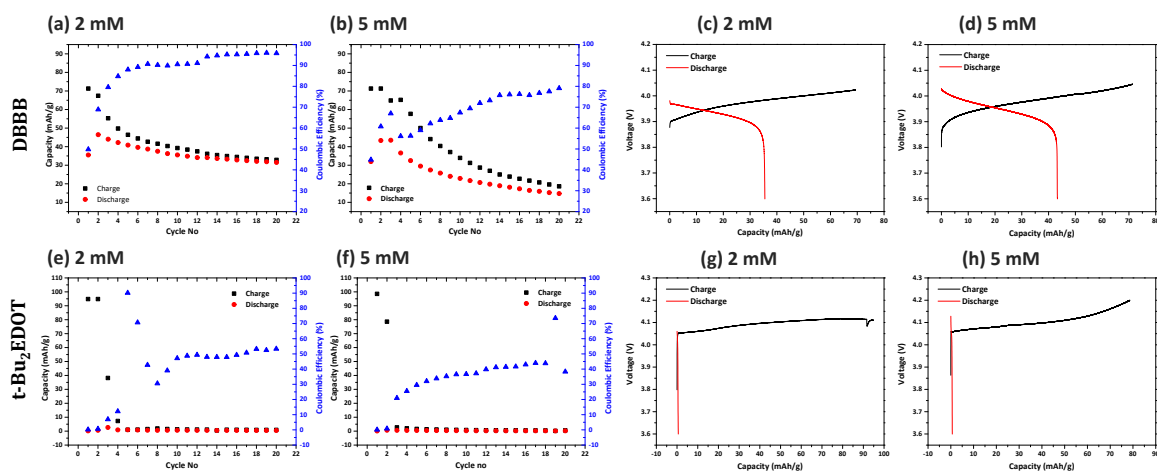

**Figure S13.** Battery characteristics of (a – d) DBBB and (e-h) tBu<sub>2</sub>EDOT at at 2 mM (a, c, e, g) and 5 mM (b, d, f, h) concentration. Capacity and efficiency over repeated charge cycles are shown in (a, b, e, f) and representative charge / discharge curves (voltage vs charge capacity) are shown in (c, d, g, h).

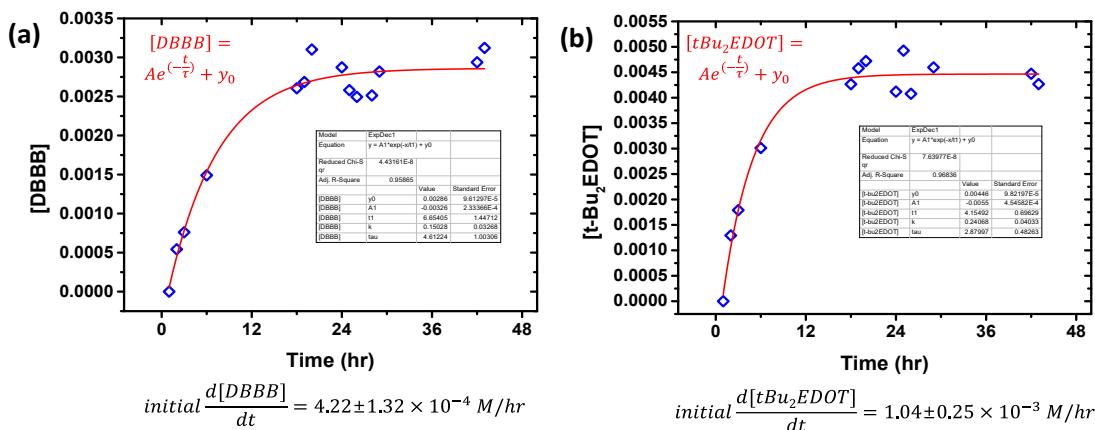

**Figure S14.** Crossover experiment involving running the flow cell with an initial concentration of 10.0 mM in the catholyte reservoir and 0 mM concentration in the anolyte reservoir, without charging. Anolyte concentration vs time data are shown for of (a) DBBB and (b) *t*-Bu<sub>2</sub>EDOT, which were calculated from changes in UV-vis spectra of aliquots taken from the anolyte side using a volumetric micropipette. The data show that both DBBB and *t*-Bu<sub>2</sub>EDOT cross the separator membrane to the anolyte side over the course of several hours.

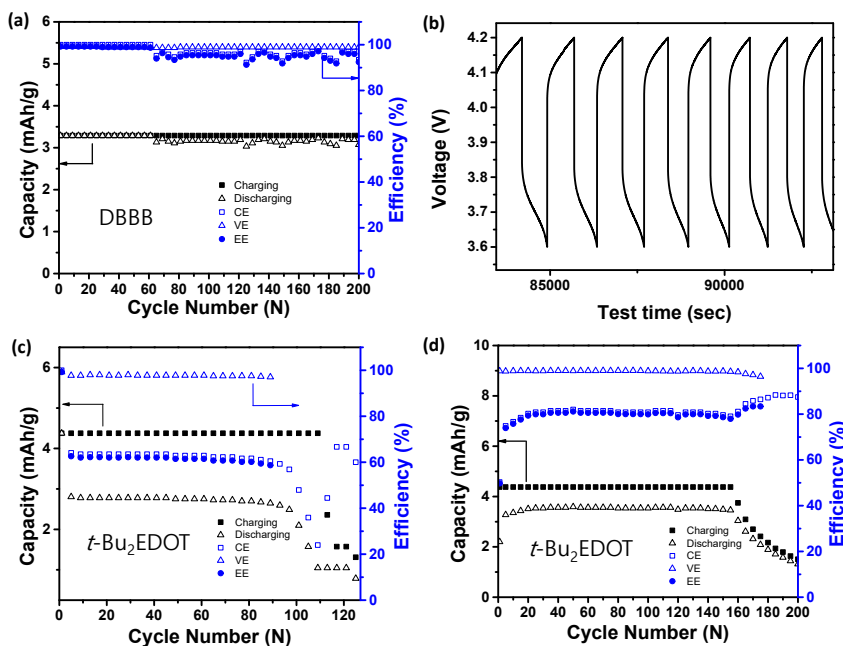

**Figure S15.** Rapid charge/discharge tests. Catholytes were prepared by using 1 mM DBBB (a) and 1 mM *t*-Bu<sub>2</sub>EDOT (b), (c), (d) with 0.5 M LiTFSI in PC. Cells were charged and discharged at 4 % of theoretical capacity at a current density was of 1.25  $\mu\text{A}/\text{cm}^2$ . In (a), (b) and (c), Tygon-LFL tubing is used, while Viton is used in (d). (b) Shows a close-up of voltage vs time plots for several charge / discharge cycles for *t*-Bu<sub>2</sub>EDOT, corresponding to the efficiencies shown in plot (c).

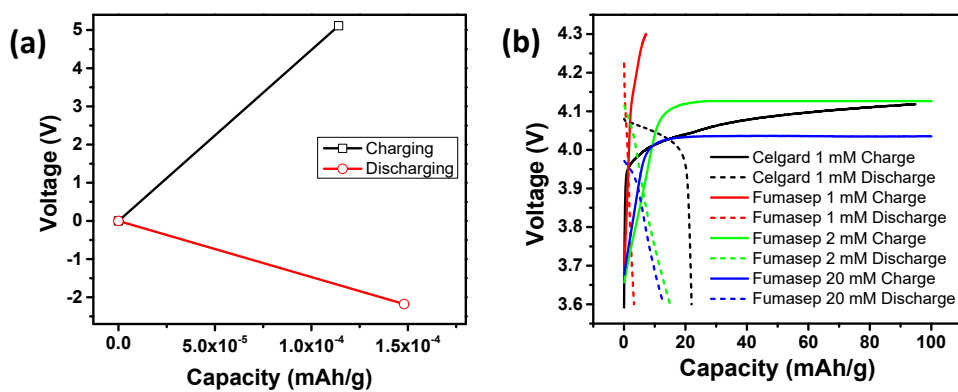

**Figure S16.** Battery tests using anion exchange membranes. (a) Charging / discharging characteristics using Selemion AMVN anion exchange membrane. (b) Charging / discharging characteristics using Fumasep FAP-450 anion exchange membrane.
